# Supplementary material
Source: PubMed Central journal article supplement (PMC2716483)
Supplement: mmc1.pdf [file mmc1.pdf]

Biophysical Journal, Volume 96

**Supplementary Material**

**Replica exchange simulations of the thermodynamics of A $\beta$  fibril growth**

Takako Takeda and Dmitri K. Klimov

## Supplemental Material

In order to provide alternative view of the free energy surface  $\Delta F(N_{phb}, N_{ahb})$  shown in Figure 4 we present its contour plot. The labeling of the states adopted by the edge peptide is the same as in Figure 4. The contour lines are plotted with the increment of  $0.8RT$  and the ticks are directed downhill. The free energy of the state (r) is set to zero.

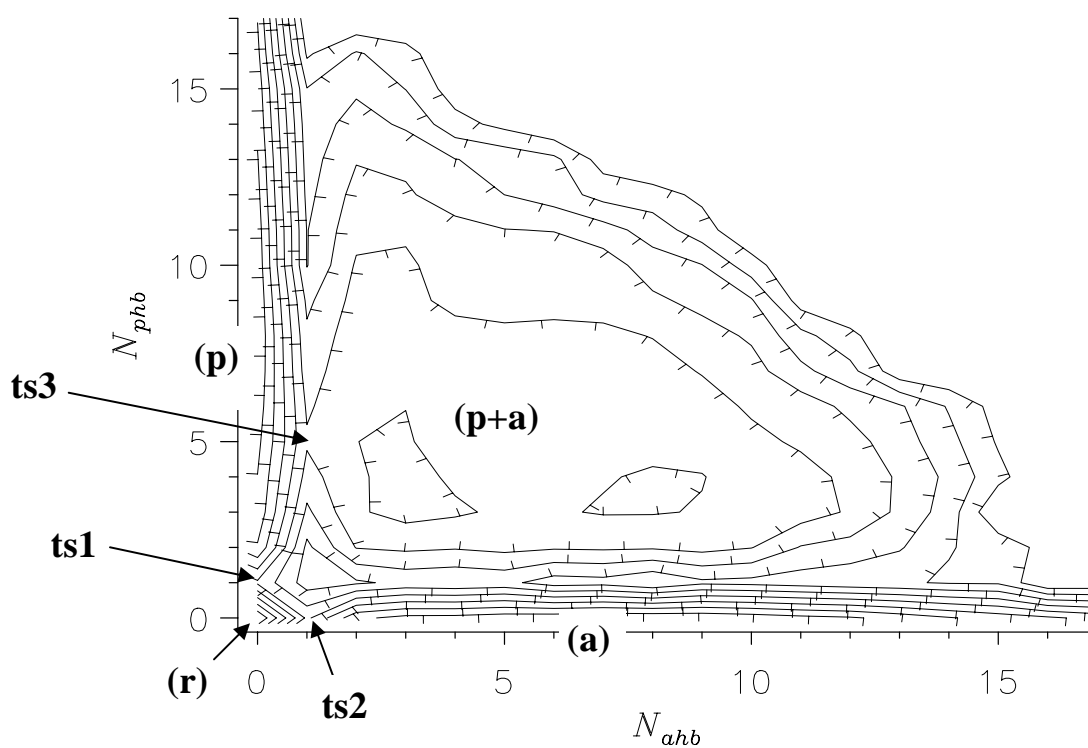

Supplemental Figure 1
